# Supplementary material for: Highly luminescent broadband phosphors based on acid solvent coordinated two-dimensional layered tin-based perovskites
Source: Royal Society of Chemistry journal article supplement (doi:10.1039/d1tc05318c), 2022-01-01
Supplement: d1tc05318c1.pdf [file d1tc05318c1.pdf]

## Supporting information

### **Highly luminescent broadband phosphors based on acid solvent coordinated two-dimensional layered tin-based perovskites**

*Lu Zhang,<sup>a</sup> Bobo Yang,<sup>\*a</sup> Shiliang Mei,<sup>\*b</sup> Yuxuan Zhu,<sup>a</sup> Rongrong Hu,<sup>a</sup>  
Jun Zou,<sup>\*acd</sup>*

a. Shanghai Institute of Technology, Shanghai 201418, China. E-mail: boboyang@sit.edu.cn.

b. Institute for Electric Light Sources, School of Information Science and Technology, Fudan University, Shanghai 200433, China. E-mail: meishiliang@fudan.edu.cn.

c. Institute of New Materials & Industrial Technology, Wenzhou University, Wenzhou 325024, China. E-mail: zoujun@sit.edu.cn.

d. National Semiconductor Lighting Application System Engineering Technology Research Center, Shanghai 201418, PR China.

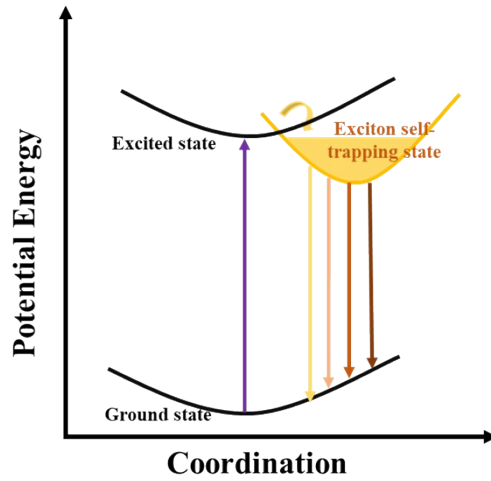

Fig. S1 Schematic of the process of emission from the exciton self-trapping state.

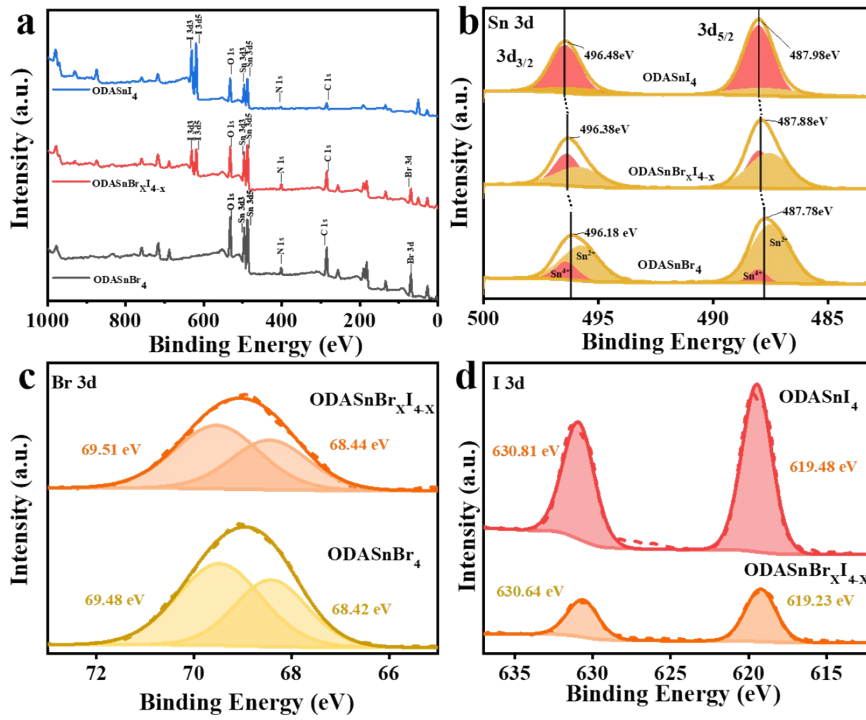

Fig. S2 X-ray photoelectron spectroscopy (XPS) of ODASnBr<sub>4</sub>, ODASnBr<sub>x</sub>I<sub>4-x</sub> and ODASnI<sub>4</sub>. (a) survey spectra of ODASnBr<sub>4</sub>, ODASnBr<sub>x</sub>I<sub>4-x</sub> and ODASnI<sub>4</sub>; XPS spectra of (b) Sn3d, (c) Br3d, and (d) I3d core levels.

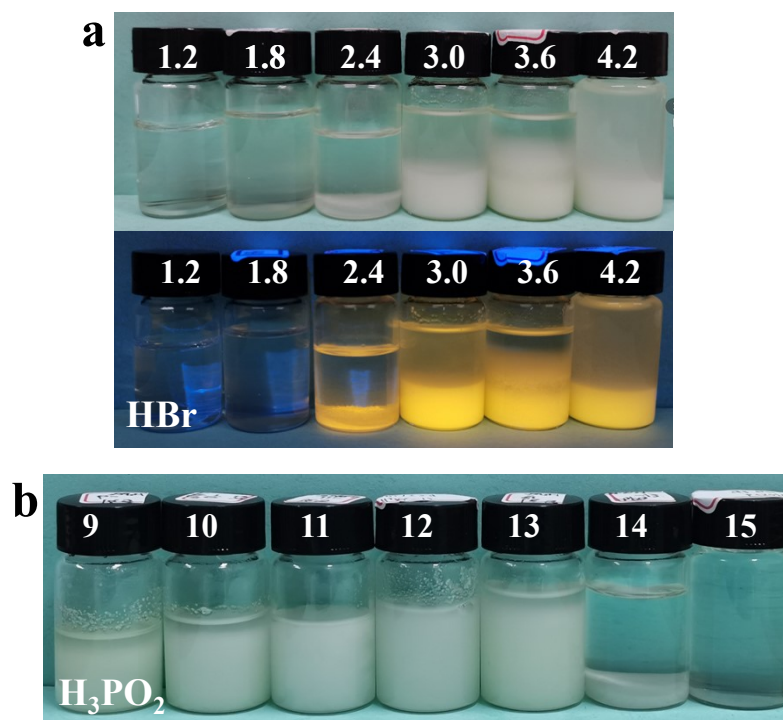

Fig. S3 Photographs of the ODASnBr<sub>4</sub> suspension synthesized by different volumes of (a) HBr and (b) H<sub>3</sub>PO<sub>2</sub> respectively.

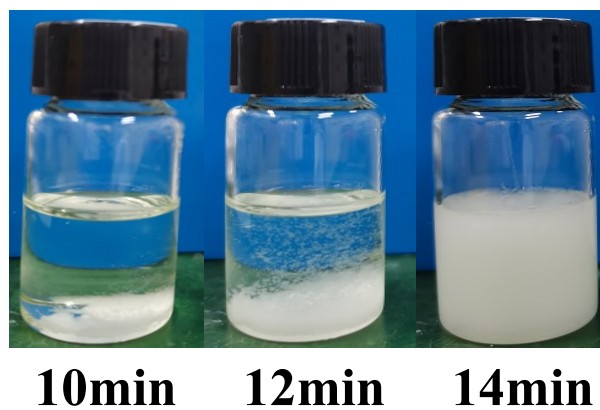

Fig. S4 The production process of sample with H<sub>3</sub>PO<sub>2</sub> of 13 mL. The time at the bottom of the picture represents the time after the solution cooled naturally from 80 °C.

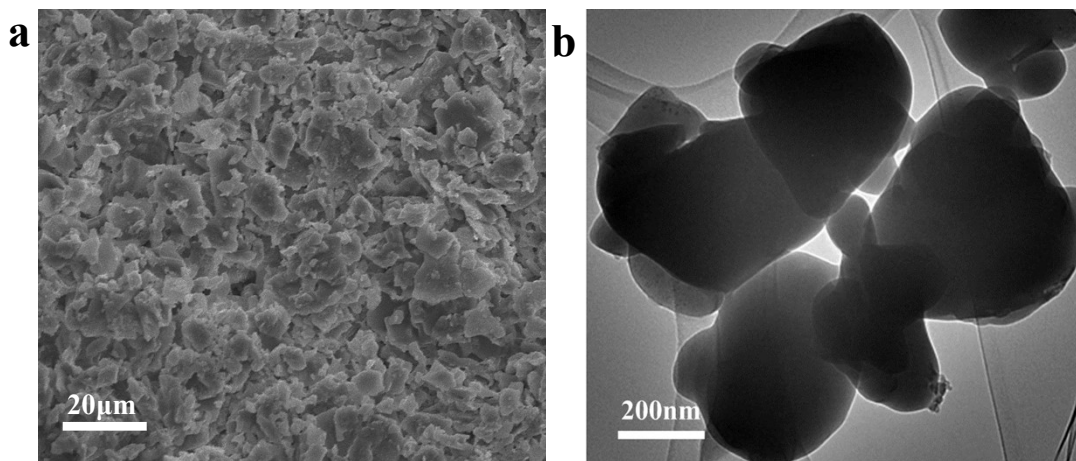

Fig. S5 (a) SEM images and (b) TEM images of ODASnBr<sub>4</sub> (samples HBr 3.0 mL).

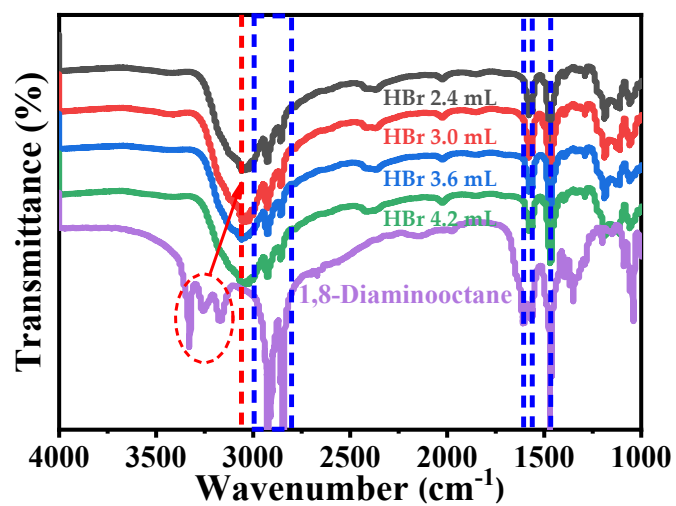

Fig. S6 FTIR spectra of ODASnBr<sub>4</sub> perovskite and the reactants used in its synthesis.

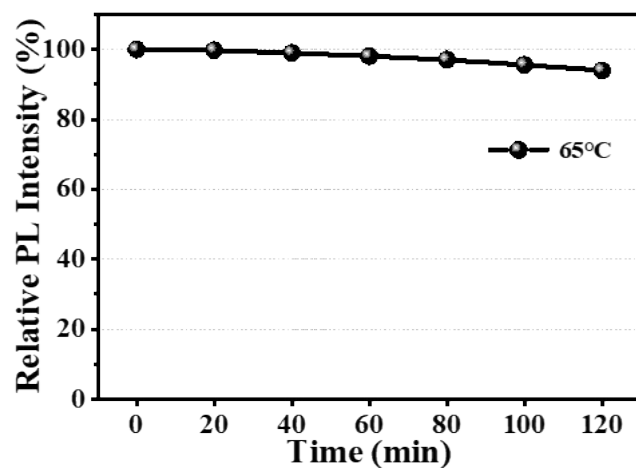

Fig. S7 Relative PL intensity of ODASnBr<sub>4</sub> at 65 °C for 120 mins.

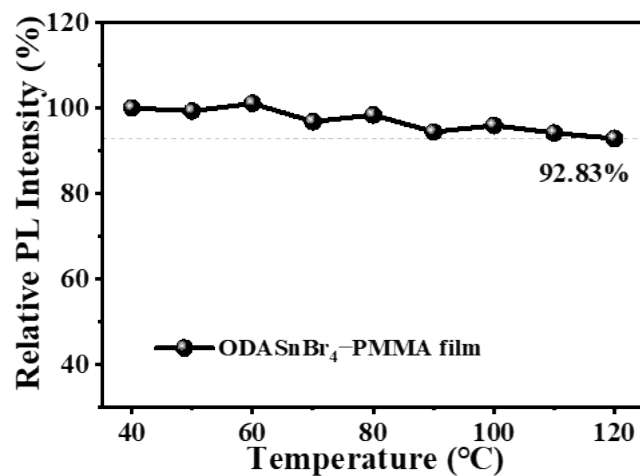

Fig. S8 Relative PL intensity of ODASnBr<sub>4</sub>-PMMA film heat from 40 to 120 °C.

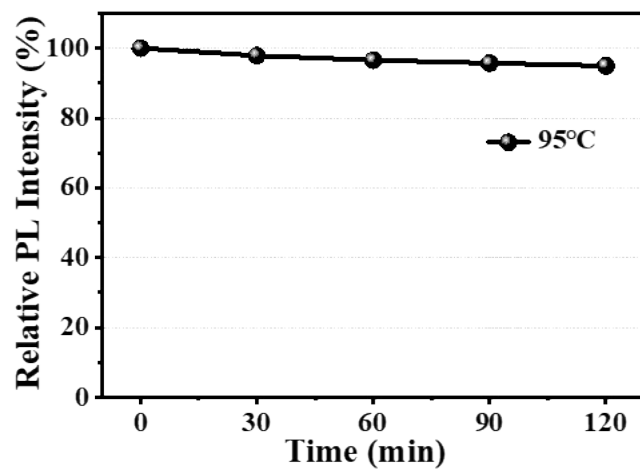

Fig. S9 Relative luminance efficiency of film at 95 °C for 120 min.

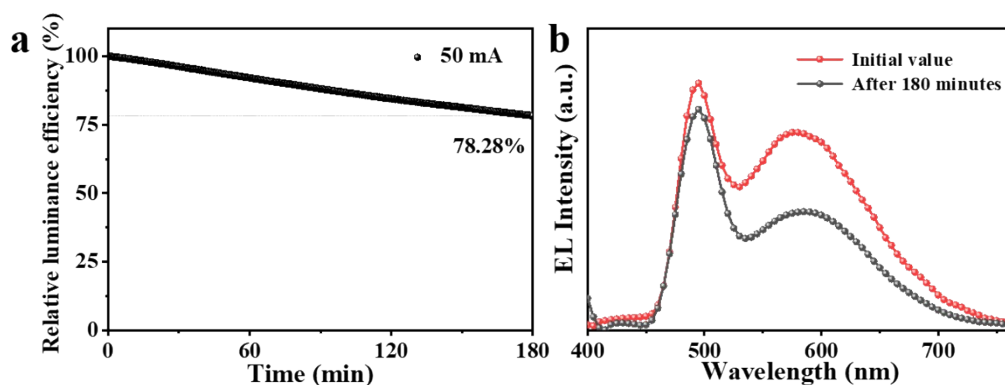

Fig. S10 (a) Relative luminance efficiency of as-fabricated WLEDs and (b) EL spectra of different times.

Table S1. The comparison of the XRD with other reported results.

| Chemical formula                | $2\theta/^\circ$ |         |         | Ref.      |
|---------------------------------|------------------|---------|---------|-----------|
|                                 | (0 0 2)          | (0 0 4) | (0 0 8) |           |
| ODASnBr <sub>4</sub>            | 6.20             | 12.47   | 24.77   | S1        |
| ODASnBr <sub>4</sub> [2%-DCM]   | 6.18             | 12.42   | -       | S1        |
| ODASnBr <sub>4</sub> [2%-CFM]   | 6.13             | 12.30   | 23.7    | S1        |
| ODASnBr <sub>4</sub>            | 6.71             | 13.40   | -       | S2        |
| Calculated ODASnBr <sub>4</sub> | 6.56             | 13.15   | -       | S2        |
| ODASnBr <sub>4</sub> [EtOH]     | 6.70             | 13.36   | 29.9    | S2        |
| ODASnBr <sub>4</sub> [PrOH]     | 6.41             | 12.80   | -       | S2        |
| ODASnBr <sub>4</sub> [BuOH]     | 6.45             | 12.86   | -       | S2        |
| ODASnBr <sub>4</sub> [PeOH]     | 6.42             | 12.80   | -       | S2        |
| ODASnBr <sub>4</sub> [alcohol]  | 6.12-6.28        | -       | -       | S3        |
| ODASnBr <sub>4</sub>            | 6.36             | 12.72   | 25.44   | This work |

Table S2. Comparison of microstructure and spectroscopic properties of ODASnBr<sub>4</sub>.

| Chemical formula               | Experiment method                                                                                          | Microstructure                         | Spectroscopic properties |            |                   | Ref.      |
|--------------------------------|------------------------------------------------------------------------------------------------------------|----------------------------------------|--------------------------|------------|-------------------|-----------|
|                                |                                                                                                            |                                        | PL peak (nm)             | PLQY (%)   | $\tau$ ( $\mu$ s) |           |
| ODASnBr <sub>4</sub> [2% CFM]  | ligand assisted re-precipitation method followed by CFM/DCM treatment                                      | spherical microcrystals                | 570-598                  | 88 $\pm$ 4 | >2.4              | S1        |
| ODASnBr <sub>4</sub> [2% DCM]  |                                                                                                            |                                        | 592-608                  | 83 $\pm$ 4 | >2.9              |           |
| ODASnBr <sub>4</sub> [EtOH]    | argon gas assisted saturation recrystallization method followed by grinding with different alcohol dopants | irregular layered structure (20-50 nm) | 616                      | 86         | 3.61              | S2        |
| ODASnBr <sub>4</sub> [PrOH]    |                                                                                                            | regular layered structure (>100 nm)    | 611                      | 83         | 3.37              |           |
| ODASnBr <sub>4</sub> [BuOH]    |                                                                                                            | crumby structure                       | 613                      | 87         | 3.24              |           |
| ODASnBr <sub>4</sub> [PeOH]    |                                                                                                            | crumby structure                       | 615                      | 87         | 3.32              |           |
| ODASnBr <sub>4</sub> [alcohol] | wet milling method                                                                                         | 2D sheet                               | 572-601                  | 88 $\pm$ 1 | >2.9              | S3        |
| ODASnBr <sub>4</sub>           | saturation recrystallization method in ambient environment                                                 | flake microcrystals (5-20 $\mu$ m)     | 586                      | 98.22      | 3.166             | This work |

Table S3. The performance parameter of the as-fabricated WLEDs.

| LED                | drive current (mA) | luminous flux (lm) | luminance efficiency (lm/W) | CRI  | color coordinate |
|--------------------|--------------------|--------------------|-----------------------------|------|------------------|
| Blue: Yellow = 1:2 | 50                 | 0.9612             | 6.408                       | 89.4 | (0.3421, 0.3384) |
| Blue: Yellow = 1:2 | 60                 | 1.1817             | 6.565                       | 89.9 | (0.3429, 0.3466) |
| Blue: Yellow = 1:2 | 70                 | 1.4036             | 6.684                       | 90.3 | (0.3439, 0.3526) |
| Blue: Yellow = 1:2 | 80                 | 1.6341             | 6.808                       | 90.3 | (0.3452, 0.3547) |
| Blue: Yellow = 1:2 | 90                 | 1.8650             | 6.908                       | 90.1 | (0.3466, 0.3614) |
| Blue: Yellow = 1:4 | 50                 | 0.9744             | 6.496                       | 86.1 | (0.3227, 0.3209) |
| Blue: Yellow = 1:4 | 60                 | 1.1872             | 6.596                       | 86.5 | (0.3212, 0.3228) |
| Blue: Yellow = 1:4 | 70                 | 1.4084             | 6.707                       | 86.9 | (0.3198, 0.3250) |
| Blue: Yellow = 1:4 | 80                 | 1.6457             | 6.857                       | 87.4 | (0.3162, 0.3291) |
| Blue: Yellow = 1:4 | 90                 | 1.8722             | 6.934                       | 87.1 | (0.3134, 0.3352) |

**References:**

- S1. S. Wang, J. Popović, S. Burazer, A. Portniagin, F. Liu, K. Low, Z. Duan, Y. Li, Y. Xiong, Y. Zhu, S. V Kershaw, A. B. Djurišić and A. L. Rogach, *Adv. Funct. Mater.* 2021, 31, 2102182.
- S2. S. Wang, S. V Kershaw and A. L. Rogach, *Chem. Mater.*, 2021, 33, 5413-5421.
- S3. J. Qi, S. Wang, A. Portniagin, S. V Kershaw and A. L. Rogach, *Nanomaterials*, 2021, 11, 2738-2748.
